# Supplementary material for: Determining HER2 Status by Artificial Intelligence: An Investigation of Primary, Metastatic, and HER2 Low Breast Tumors
Source: MDPI journal article supplement (doi:10.3390/diagnostics13010168), 2023-01-03
Supplement: s1 [file s1]

| Laboratory Staining Protocol | IHC Score | Amended Staining Protocol |
|------------------------------|-----------|---------------------------|
| 2                            | 0         | 25                        |
| 20                           | 1+        | 16                        |
| 25                           | 2+        | 10                        |
| 10                           | 3+        | 6                         |

**Supplement Table S1:** IHC scores assigned by AI of 57 primary IBCs using laboratory staining compared to amended (vendor recommended) staining protocols.
